# Supplementary figures and images for: A novel in vitro survival assay of small intestinal stem cells after exposure to ionizing radiation
Source: PubMed Central journal article supplement — J Radiat Res. 2014 Feb 6;55(2):381–90. doi: 10.1093/jrr/rrt123 (PMC3951085; doi:10.1093/jrr/rrt123), 2014-02-06

# Supplementary Fig. 1

**A**

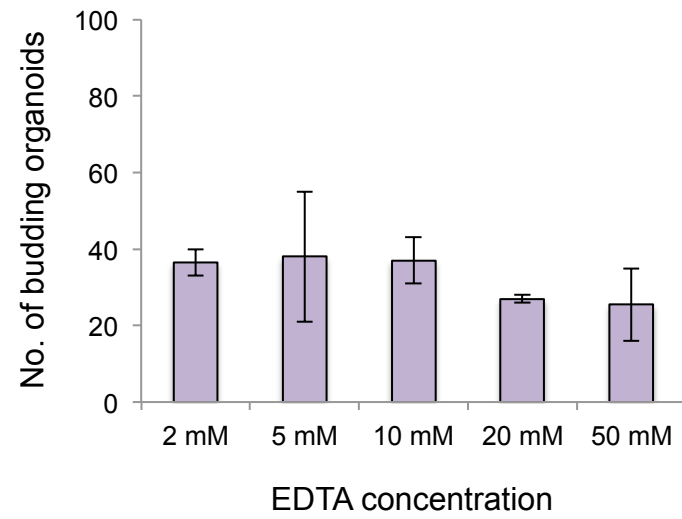

**B**

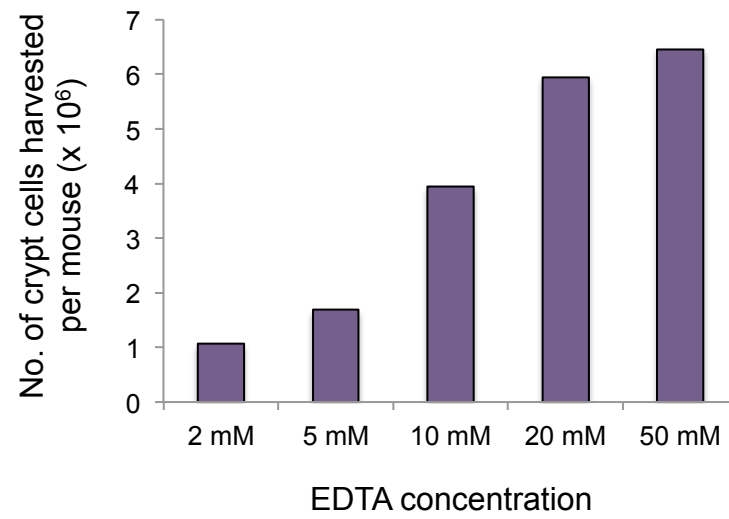

Supplement: supp_rrt123_rrt123supp_fig1.pdf [file supp_rrt123_rrt123supp_fig1.pdf]
